# Supplementary material for: Investigation of out-of-plane structural properties of a graphene monolayer with gap-plasmons: mode-selective Raman enhancement and the influence of additional sp3type defects
Source: Royal Society of Chemistry journal article supplement (doi:10.1039/c4cp04173a), 2014-11-04
Supplement: c4cp04173a1.pdf [file c4cp04173a1.pdf]

## Supporting Information

Investigation on Out-of-Plane Structural Properties  
of Graphene Monolayer with Gap-Plasmon  
:Mode-Selective Raman Enhancement and Influence  
of Additional SP<sup>3</sup> type Defect

Young Hwan Min and Won-Hwa Park\*

*Material Characterization Team, Materials & Components R&D Lab, LG Electronics  
Advanced Research Institute,  
38, Baumoe-ro, Seocho-gu, Seoul , South Korea, 137-724*

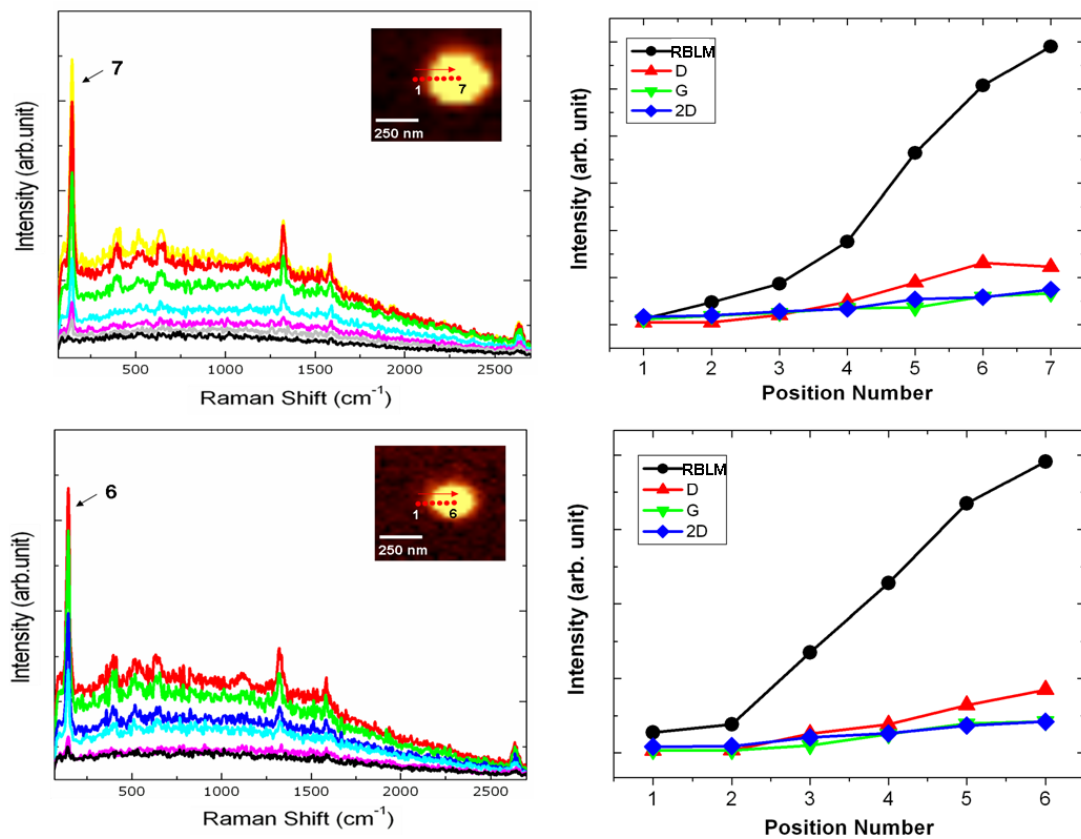

**Figure S1.** Two additional junctions showing similar lateral approach profiles and the resulting mode-dependent Raman enhancement.
